# Supplementary material for: Genomic Characterization of the Taylorella Genus
Source: PLoS One. 2012 Jan 3;7(1):e29953. doi: 10.1371/journal.pone.0029953 (PMC3250509; doi:10.1371/journal.pone.0029953)
Supplement: Table S2 — T. asinigenitalis MCE3 specific CDSs. Genes with no homolog in T. equigenitalis MCE9 by reciprocal FASTA using a minimum cutoff of 50% amino acid similarity over 80% or more of the sequence. (XLSX) [file pone.0029953.s003.xlsx]

## Sheet: MCE3 specific genes
Table S2 T. asinigenitalis MCE3 specific CDSs
Genes with no homolog in T. equigenitalis MCE9 by reciprocal FASTA using a minimum cutoff of 50% amino acid similarity over 80% or more of the sequence.
ORF	Gene	Start	Stop	Strand	A.A. lenght	Divergent regiona, b
TASI_0081	Uncharacterized protein ImpH/VasB	80496	81725	c	409
TASI_0100	hypothetical protein	109477	110064		195	Region 1 Unknown function
TASI_0101	hypothetical protein	110664	111317		217
TASI_0102	hypothetical protein	111314	111934		206
TASI_0103	hypothetical protein	111983	112603		206
TASI_0104	hypothetical protein	114045	114698		217
TASI_0105	hypothetical protein	114695	115315		206
TASI_0106	hypothetical protein	116547	117191		214
TASI_0107	hypothetical protein	117188	117808		206
TASI_0109	hypothetical protein	119810	120703		297
TASI_0110	hypothetical protein	120716	121609		297
TASI_0111	hypothetical protein	121621	122511		296
TASI_0116	hypothetical protein	128359	129090		243
TASI_0117	hypothetical protein	129103	129255	c	50
TASI_0118	hypothetical protein	129290	129838		182
TASI_0119	hypothetical protein	129835	130401	c	188
TASI_0121	hypothetical protein	131117	131266		49
TASI_0122	hypothetical protein	131288	131494		68
TASI_0123	hypothetical protein	131531	131686		51
TASI_0124	hypothetical protein	131729	131917		62
TASI_0125	hypothetical protein	132998	133510		170
TASI_0126	hypothetical protein	133507	134073	c	188
TASI_0127	hypothetical protein	134067	134570	c	167
TASI_0128	hypothetical protein	136013	136444		143
TASI_0129	hypothetical protein	136426	137076		216
TASI_0130	hypothetical protein	137073	137711		212
TASI_0131	hypothetical protein	137704	138378		224
TASI_0132	hypothetical protein	138380	139015		211
TASI_0133	hypothetical protein	139225	139368		47
TASI_0136	hypothetical protein	141463	141999		178
TASI_0137	hypothetical protein	142024	142572		182
TASI_0157	helix-turn-helix domain protein	159982	160308	c	108
TASI_0158	Cytotoxic translational repressor of toxin-antitoxin stability system	160295	160612	c	105
TASI_0168	hypothetical protein	171238	171393		51
TASI_0169	Zinc ABC transporter, ATP-binding protein ZnuC	171816	172112		98
TASI_0187	hypothetical protein	189455	189610		51
TASI_0192	hypothetical protein	192106	192327		73
TASI_0204	ATP-dependent hsl protease ATP-binding subunit HslU	203155	203817	c	220
TASI_0205	ATP-dependent hsl protease ATP-binding subunit HslU	203831	204490	c	219
TASI_0213	ATPase	212784	214064		426	Region 2 CRISPR
TASI_0215	CRISPR-associated protein	215798	216754		318
TASI_0216	hypothetical protein	216751	219006		751
TASI_0217	membrane protein	222073	223377		434
TASI_0218	putative 2-pyrone-4,6-dicarboxylic acid hydrolase	223387	224187		266
TASI_0224	hypothetical protein	230199	230369		56
TASI_0261	hypothetical protein	259674	259865	c	63
TASI_0277	hypothetical protein	275207	275902		231	Region 3 Unknown function
TASI_0278	hypothetical protein	275995	283665		2556
TASI_0279	hypothetical protein	283801	284391		196
TASI_0290	TPR repeat protein	293861	294166		101
TASI_0337	hypothetical protein	340743	340865		40
TASI_0338	hypothetical protein	340874	341026	c	50
TASI_0339	Peptidyl-tRNA hydrolase	341232	341678		148
TASI_0385	hypothetical protein	386124	386276	c	50	Region 4 Antigen O region
TASI_0387	2,3,4,5-tetrahydropyridine-2,6-dicarboxylate N-acetyltransferase	386750	387397		215
TASI_0388	4-keto-6-deoxy-N-Acetyl-D-hexosaminyl-(Lipid carrier) aminotransferase	387399	388550		383
TASI_0391	hypothetical protein	391390	393213		607
TASI_0392	hypothetical protein	393529	395166		545
TASI_0412	integrase/recombinase	417609	418574		321	Region 5 Phage region
TASI_0413	hypothetical phage protein	418720	419040	c	106
TASI_0414	Methyl-directed repair DNA adenine methylase	419272	419949	c	225
TASI_0415	DNA adenine methylase subfamily	419904	420068	c	54
TASI_0416	Helix-turn-helix domain containing protein	420055	420294	c	79
TASI_0417	Single-stranded DNA-binding protein	420291	420671	c	126
TASI_0418	conserved hypothetical protein	420672	421037	c	121
TASI_0419	phage protein	421057	421311	c	84
TASI_0420	phage protein	421495	421974	c	159
TASI_0421	phage protein	421971	422858	c	295
TASI_0422	hypothetical protein	422848	423054	c	68
TASI_0423	hypothetical protein	423064	423270	c	68
TASI_0424	hypothetical protein	423254	423625	c	123
TASI_0425	hypothetical protein	423812	424261	c	149
TASI_0426	prophage transcriptional regulator, Cro/CI family	424272	424967	c	231
TASI_0427	hypothetical phage protein	425065	425295		76
TASI_0428	Phage NinB DNA recombination	425339	425674		111
TASI_0429	conserved hypothetical phage protein	425661	425933		90
TASI_0430	Transcriptional activator adenine-specific DNA methyltransferase-like	425930	426859		309
TASI_0431	putative helicase	426852	428339		495
TASI_0432	hypothetical phage protein	428476	429168		230
TASI_0433	hypothetical protein	429945	430379		144
TASI_0434	hypothetical phage protein	430366	430704	c	112
TASI_0435	hypothetical protein	430706	430864	c	52
TASI_0436	hypothetical protein	430958	431350	c	130
TASI_0437	hypothetical protein	431386	431757	c	123
TASI_0438	hypothetical protein	432569	432712		47
TASI_0439	Phage terminase, small subunit	432839	433369		176
TASI_0440	Phage terminase, large subunit	433512	434798		428
TASI_0441	Haemophilus-specific protein, uncharacterized	434801	436783		660
TASI_0442	hypothetical protein	436786	437079		97
TASI_0443	hypothetical phage protein	437183	437476		97
TASI_0444	hypothetical phage protein	437466	438608		380
TASI_0445	hypothetical phage protein	438614	440062		482
TASI_0446	hypothetical phage protein	440077	441147		356
TASI_0447	hypothetical phage protein	441181	441615		144
TASI_0448	hypothetical phage protein	441608	441826		72
TASI_0449	hypothetical phage protein	441920	442834		304
TASI_0450	capsid phage protein	442963	443832		289
TASI_0451	hypothetical phage protein	443843	444349		168
TASI_0452	hypothetical phage protein	444410	444751		113
TASI_0453	hypothetical phage protein	444744	445391		215
TASI_0454	hypothetical phage protein	445369	445974		201
TASI_0455	hypothetical phage protein	445971	446339		122
TASI_0456	hypothetical phage protein	446342	446947		201
TASI_0457	phage protein	446938	448557		539
TASI_0458	phage protein	448554	449030		158
TASI_0459	hypothetical phage protein	449027	449971		314
TASI_0460	hypothetical phage protein	449982	451289		435
TASI_0461	Phage endolysin	451324	452001		225
TASI_0462	hypothetical phage protein	451998	462056		3352
TASI_0463	hypothetical phage protein	462069	462239		56
TASI_0464	putative phage lysozyme	462229	462699		156
TASI_0465	hypothetical protein	462696	463040		114
TASI_0466	YcfA family protein	463248	463421	c	57
TASI_0468	putative phage repressor	464171	464848	c	225
TASI_0469	hypothetical phage protein	464964	465212		82
TASI_0470	NinB phage protein	465256	465459		67
TASI_0471	hypothetical protein	466119	466307	c	62
TASI_0472	hypothetical protein	466267	466425		52
TASI_0473	hypothetical protein	466525	466911		128
TASI_0474	hypothetical protein	466911	467066		51
TASI_0475	hypothetical protein	467170	467532		120
TASI_0476	hypothetical protein	467504	468490		328
TASI_0495	hypothetical protein	487327	487644		105
TASI_0496	FIG045511: hypothetical antitoxin	487663	487956		97
TASI_0500	2-C-methyl-D-erythritol 2,4-cyclodiphosphate synthase	493003	493488		161
TASI_0538	3-oxoacyl-[acyl-carrier protein] reductase	533655	534395		246
TASI_0550	hypothetical protein	545949	546137	c	62
TASI_0560	hypothetical protein	554802	555638		278	Region 6 Unknown function
TASI_0561	hypothetical protein	555693	555851		52
TASI_0562	hypothetical protein	555805	556050	c	81
TASI_0563	Chaperone protein DnaJ	556383	556661		92
TASI_0564	hypothetical protein	556833	557192		119
TASI_0581	Cell filamentation protein fic	579056	579610		184
TASI_0596	hypothetical protein	593146	596304		1052
TASI_0686	hypothetical protein	685958	686929		323
TASI_0721	restriction enzyme	726670	728328	c	552	Region 7 Restriction Modification
TASI_0722	DNA-cytosine methyltransferase	728364	729650		428
TASI_0725	hypothetical protein	734104	734442		112
TASI_0728	hypothetical protein	736681	736800	c	39
TASI_0753	hypothetical protein	761006	761434		142
TASI_0754	hypothetical protein	761500	761841		113
TASI_0785	hypothetical protein	793235	793429	c	64
TASI_0787	hypothetical protein	793678	793848	c	56
TASI_0817	2,3-butanediol dehydrogenase, S-alcohol forming, (S)-acetoin-specific	824644	825417	c	257
TASI_0828	hypothetical protein	837879	838046	c	55
TASI_0835	NAD synthetase	844438	845076		212
TASI_0849	hypothetical protein	861775	861888	c	37
TASI_0850	hypothetical protein	861951	862214	c	87
TASI_0890	hypothetical protein	898341	898517	c	58
TASI_0939	hypothetical protein	951488	951625	c	45
TASI_0944	Y22D7AR.1 protein	954463	955248	c	261
TASI_0947	hypothetical protein	956871	959294	c	807
TASI_0987	hypothetical protein	1011425	1011655		76
TASI_0989	Hydratase/decarboxylase	1012184	1012996	c	270
TASI_0990	hypothetical protein	1013051	1013236	c	61
TASI_0997	hypothetical protein	1021017	1021241	c	74	Region 8 Unknown function
TASI_0998	hypothetical protein	1021427	1021954	c	175
TASI_0999	TRAP transporter solute receptor, unknown substrate 1	1022307	1022537	c	76
TASI_1001	hypothetical protein	1023360	1024361	c	333
TASI_1002	hypothetical protein	1024364	1024963	c	199
TASI_1003	hypothetical protein	1025155	1025274	c	39
TASI_1006	hypothetical protein	1028018	1028794		258
TASI_1007	hypothetical protein	1028848	1028964		38
TASI_1013	Prophage antirepressor	1032727	1033284	c	185
TASI_1016	hypothetical protein	1036166	1036354	c	62
TASI_1017	hypothetical protein	1036370	1037152	c	260
TASI_1025	Huntingtin interacting protein E-like protein	1043366	1044100		244
TASI_1028	hypothetical protein	1046338	1046454	c	38
TASI_1031	hypothetical protein	1047383	1047700	c	105
TASI_1032	hypothetical protein	1048132	1048329	c	65
TASI_1033	RHS protein	1048594	1048965	c	123
TASI_1035	Rhs family protein	1049609	1051684	c	691
TASI_1036	hypothetical protein	1051919	1052842	c	307
TASI_1044	hypothetical protein	1068929	1069795	c	288
TASI_1047	ClpB protein	1071663	1072715	c	350
TASI_1066	hypothetical protein	1093727	1093876		49
TASI_1069	hypothetical protein	1095442	1095585	c	47
TASI_1082	Ribosomal large subunit pseudouridine synthase D	1106520	1107491	c	323
TASI_1084	DinG family ATP-dependent helicase YoaA	1108399	1110414	c	671
TASI_1106	hypothetical protein	1134841	1135950		369
TASI_1107	DNA-cytosine methyltransferase	1135924	1137201	c	425
TASI_1123	Histidine ammonia-lyase	1150629	1150904	c	91
TASI_1139	ATP-dependent Clp protease ATP-binding subunit ClpX	1167423	1168649	c	408
TASI_1165	hypothetical protein	1201504	1203378	c	624
TASI_1184	hypothetical protein	1222682	1222801	c	39
TASI_1185	autotransporter	1222815	1223750	c	311
TASI_1186	yapH homolog	1223790	1226969	c	1059
TASI_1187	hypothetical protein	1227110	1229959	c	949
TASI_1201	DNA polymerase, beta domain protein region	1242312	1242605	c	97
TASI_1203	hypothetical protein	1243754	1244569		271
TASI_1204	Type II restriction enzyme HpaII	1244616	1245647	c	343
TASI_1205	DNA-cytosine methyltransferase	1245631	1246632	c	333
TASI_1206	iron-dependent peroxidase, Dyp-type family	1246731	1247663		310
TASI_1260	Tripartite ATP-independent periplasmic transporter, DctQ component	1300412	1300867		151
TASI_1263	ATP-dependent DNA helicase RecQ	1303169	1304596	c	475
TASI_1270	hypothetical protein	1310577	1310735		52
TASI_1310	Cytosine deaminase	1356868	1358118	c	416
TASI_1311	L-arabinose/isopropyl-beta-D- thiogalactopyranoside export protein (MFS)	1358178	1359377	c	399
TASI_1366	hypothetical protein	1416678	1416821		47
TASI_1378	hypothetical protein	1426715	1426837		40
TASI_1379	histone protein	1427236	1428015		259
TASI_1469	hypothetical protein	1520416	1520961		181
TASI_1470	hypothetical protein	1520958	1521320		120
TASI_1511	hypothetical protein	1558923	1559057	c	44	Region 9 Unknown function
TASI_1512	hypothetical protein	1559413	1559886		157
TASI_1517	hypothetical protein	1566905	1567018	c	37
TASI_1518	ATP-dependent DNA helicase recG	1567437	1568888	c	483
TASI_1538	GTP-binding protein TypA/BipA	1596224	1597414	c	396
TASI_1548	DNA-cytosine methyltransferase	1607109	1608125		338
TASI_1549	type II restriction endonuclease	1608145	1609155		336
TASI_1551	hypothetical protein	1609458	1609586	c	42
TASI_1568	Translation elongation factor Tu	1628008	1629198	c	396
a Divergent regions correspond to the regions shown in Figure 4
b No PCR region number indicates the absence of the ORF in the regions in Figure 4.
